# Supplementary material for: CRISPR/Cas9-mediated mutagenesis of phytoene desaturase in diploid and octoploid strawberry
Source: PubMed Central journal article supplement (PMC6495592; doi:10.1186/s13007-019-0428-6), 2019-05-02
Supplement: 13007_2019_428_MOESM1_ESM.pdf [file 13007_2019_428_MOESM1_ESM.pdf]

## Supplementary Information

(a)

*GGAGTGATCAAAAGTCCCACATCGATCAGGTGATATATAGCAGCTTAGTTTATATAA  
TGATAGAGTCGACATAGCGATTGACCTGATCGAGTAACTACTGggttttagagctagaaatag  
caagttaaataaggctagtcggtatcaactgaaaaagtgccaccgagtcggtgcTTTTTTTTGCAAAATTT  
CCAG*

(b)

*AGGCTACGAAATAATCCCACATCGGAAACCTCTGTCTACAAGGACTTCTTTATATAC  
AATTGACTCCCATCTAAGCTTGACCTGATCGAGTAACTACTGggttttagagctagaaatagca  
agtttaaataaggctagtcggtatcaactgaaaaagtgccaccgagtcggtgcTTTTTTTTGCAATTTTTTGC  
AA*

**Table S1.** Sequences of guide RNA constructs.

(a) *AtPDS74* incorporating *Arabidopsis U6-26* promoter consensus sequence and terminator sequence; (b) *FvPDS74* incorporating *F. vesca U6III* promoter sequence and terminator sequence, FvAssembly 1.1, LG4. Components are denoted as follows: promoter and terminator sequences are italicised; the target guide sequence 'Fv74' is in bold font; the scaffold sequence is in lower case font; an additional guanine base preceding the guide sequence is underlined.
