# Supplementary material for: CRISPR/Cas9-mediated mutagenesis of phytoene desaturase in diploid and octoploid strawberry
Source: PubMed Central journal article supplement (PMC6495592; doi:10.1186/s13007-019-0428-6), 2019-05-02
Supplement: 13007_2019_428_MOESM5_ESM.pdf [file 13007_2019_428_MOESM5_ESM.pdf]

| Phenotype can be predicted from the proportion of WT and variant sequence reads |                                                                             |                             |                               | WT sequence reads are high in relation to phenotype observed |                                                             |                                       |                                                   |            |
|---------------------------------------------------------------------------------|-----------------------------------------------------------------------------|-----------------------------|-------------------------------|--------------------------------------------------------------|-------------------------------------------------------------|---------------------------------------|---------------------------------------------------|------------|
| Albino biallelic variants regenerating from callus                              | Albino shoot tip or axillary developing from variegated or pale green shoot | Pale green/off white tissue | Green/var (variant/WT) tissue | Albino tissue, higher than expected proportion of WT reads   | Green or variegated tissue, single allele sequence variants | Tissue with possible chimaeric origin | Shoots showing evidence of continued gene editing | Cultivar   |
| 1A, C                                                                           |                                                                             | 1B                          |                               |                                                              |                                                             |                                       |                                                   | 'Hawaii 4' |
| 2B                                                                              |                                                                             |                             | 2Ci                           |                                                              |                                                             |                                       | 2C                                                |            |
| 3Bii, D                                                                         |                                                                             |                             | 3Ci                           |                                                              |                                                             |                                       |                                                   |            |
|                                                                                 |                                                                             |                             | 9A                            | 9B                                                           |                                                             |                                       |                                                   |            |
|                                                                                 |                                                                             | 10B2, C2                    | 10A1                          | 10D1                                                         | 10A2                                                        |                                       |                                                   |            |
| 12                                                                              |                                                                             |                             |                               |                                                              |                                                             |                                       |                                                   |            |
| 14                                                                              |                                                                             |                             |                               |                                                              |                                                             |                                       |                                                   |            |
| 28C1,E                                                                          |                                                                             |                             | 28D2                          | 28A1                                                         | 28B, C2, C3                                                 | 28D1                                  | 28C                                               |            |
|                                                                                 |                                                                             |                             | 32B1                          |                                                              | 32A1, A2, B2                                                | 32B1, B2                              |                                                   |            |
|                                                                                 |                                                                             |                             |                               |                                                              |                                                             | 36A3                                  |                                                   |            |
|                                                                                 | 39D                                                                         |                             | 39A, C1, C2, C3, C4           | 39B                                                          |                                                             |                                       | 39C, D                                            |            |
| 40A                                                                             |                                                                             |                             | 40B                           |                                                              |                                                             |                                       |                                                   |            |
| 46E, G, Hii                                                                     | 46Diii                                                                      | 46J                         |                               | 46F                                                          | 46A                                                         |                                       | 46D, H                                            |            |
| 74D, E                                                                          | 74Ci                                                                        | 74Cii                       | 74Gi                          |                                                              | 74A                                                         |                                       | 74C                                               |            |
| 79A, C, E                                                                       |                                                                             |                             |                               |                                                              |                                                             |                                       |                                                   |            |
| 89                                                                              |                                                                             |                             |                               |                                                              |                                                             |                                       |                                                   |            |
|                                                                                 | 90 F                                                                        | 90A                         | 90E                           | 90B                                                          | 90C                                                         |                                       |                                                   |            |
| 94B, C                                                                          |                                                                             |                             | 94A                           |                                                              |                                                             |                                       |                                                   |            |
|                                                                                 | 96A                                                                         |                             |                               |                                                              |                                                             |                                       |                                                   |            |
| 1                                                                               |                                                                             |                             |                               |                                                              |                                                             |                                       |                                                   | 'Calypso'  |
| 5A, B                                                                           |                                                                             |                             | 5D                            | 5Ci                                                          |                                                             |                                       | 5C                                                |            |
| 7A, B, C                                                                        |                                                                             |                             |                               |                                                              |                                                             |                                       |                                                   |            |
|                                                                                 |                                                                             |                             |                               | 20B                                                          |                                                             |                                       |                                                   |            |
|                                                                                 |                                                                             |                             |                               |                                                              | 59                                                          |                                       |                                                   |            |
|                                                                                 |                                                                             |                             |                               | 94                                                           |                                                             |                                       |                                                   |            |
| 100-1, 3A                                                                       |                                                                             |                             | 100-3B                        | 100-2                                                        |                                                             |                                       |                                                   |            |

**Table S3.** Summary of 'Calypso' and 'Hawaii 4' samples: correlation of sequence data with phenotype.
