# Supplementary material for: CRISPR/Cas9-mediated mutagenesis of phytoene desaturase in diploid and octoploid strawberry
Source: PubMed Central journal article supplement (PMC6495592; doi:10.1186/s13007-019-0428-6), 2019-05-02
Supplement: 13007_2019_428_MOESM8_ESM.pdf [file 13007_2019_428_MOESM8_ESM.pdf]

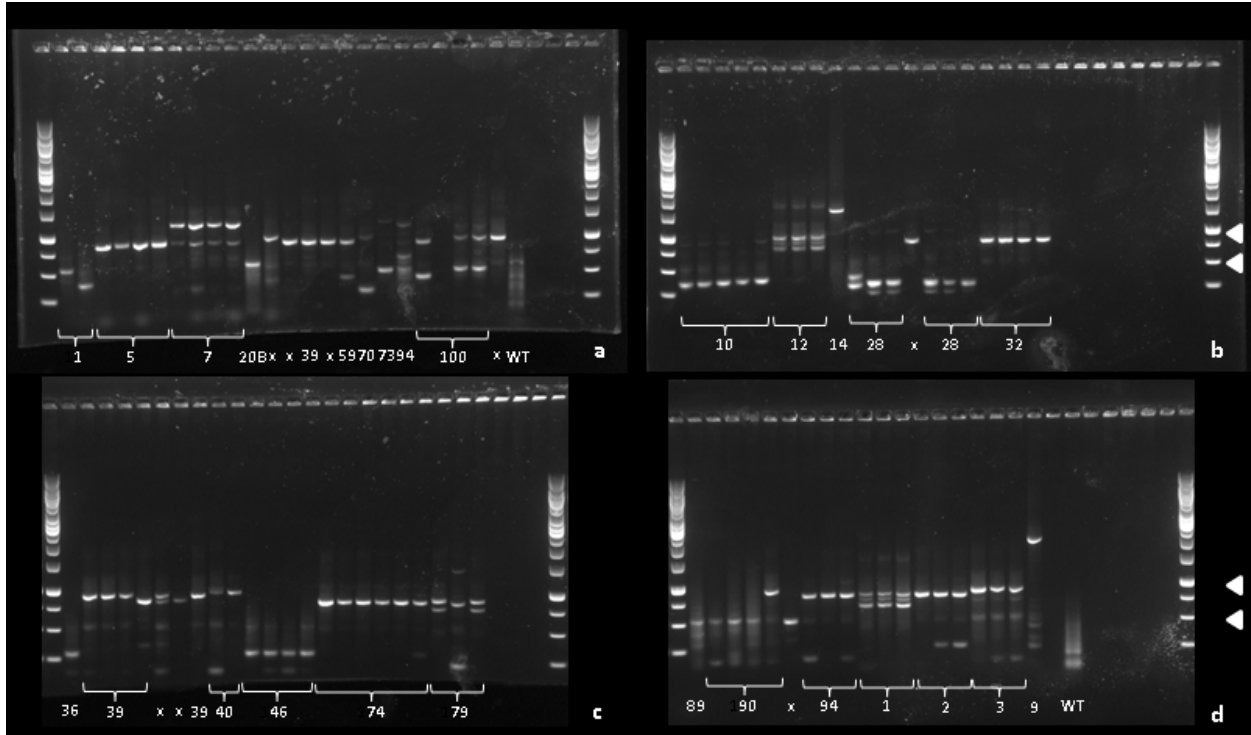

**Fig. S5.** Gel electrophoresis of TAIL PCR amplification products for Calypso (a) and Hawaii 4 (b - d).

Transgenic lines which were sequenced are numbered, samples within lines are in order according to Table S4. WT=wild-type, x = not sequenced. The arrows indicate 1 Kb and 500 bp ladder size markers.
