# Supplementary material for: CRISPR/Cas9-mediated mutagenesis of phytoene desaturase in diploid and octoploid strawberry
Source: PubMed Central journal article supplement (PMC6495592; doi:10.1186/s13007-019-0428-6), 2019-05-02
Supplement: 13007_2019_428_MOESM10_ESM.pdf [file 13007_2019_428_MOESM10_ESM.pdf]

| 'Hawaii 4' |                                                    |
|------------|----------------------------------------------------|
| 1 C        | GGCTGAAGTCCAGCTGAAGTCCAGCTGCCAGAAACCCACGTCATGCCAGT |
| 9 B        | AAGACGTCGAAGAGCATAGCACGTCTCTTGAACAATTGCAACATTTTCAA |
| 14         | TTTACAACCTTCGGCTTCGGGTTCTGATTTGGGCCTGGTAACTGGTTTTT |
| 28 C1      | TCCTTTTCTACTGTCCTTTCGATGAAGTGACAGATAGCTGGGCAATGGAA |
| 40 B       | TGGGTGGAGGTTGCTGCCAGACGTTCAAATCGATCTCGCCGGCAAGAGA  |
| 46 Diii    | ATCCTTTGCTAC                                       |
| 79E        | AGCCATG                                            |
| 'Calypso'  |                                                    |
| 1 A        | GTAAGAATAAAATAAAATATATGGGCCACCGGCAGCAGTGAGAACACGCT |
| 7 D        | TTTTTTACCCTTTTTTATATTTTTTTTTGTTCTCGATTTAATTTAATGGT |
| 73         | TGCAAAGCAGCCGTAGTCCCTCTCCTTCGTGACTGTTACCAAAGGCAAAT |
| 94         | AGCACATCCCTCCTTCATTGTCATCATGAATCAAACAAATGTTTGTTCTT |
| 100 2      | GAATATGAAATATACCCTAGCTTGGATCTGATAAATTATCAGATCCGAGC |

**Table S4.** TAIL PCR amplicon sequences for transgenic shoot lines of 'Hawaii 4' and 'Calypso'.

The sequences shown represent putative plant chromosomal sequences at the T-DNA integration site for representative shoots from each shoot line (where sequence information was obtained from multiple shoots). For sequences exceeding 50 bases only the first 50 bases are shown.
