# Supplementary material for: CRISPR/Cas9-mediated mutagenesis of phytoene desaturase in diploid and octoploid strawberry
Source: PubMed Central journal article supplement (PMC6495592; doi:10.1186/s13007-019-0428-6), 2019-05-02
Supplement: 13007_2019_428_MOESM11_ESM.pdf [file 13007_2019_428_MOESM11_ESM.pdf]

|                                |                                                                                 |
|--------------------------------|---------------------------------------------------------------------------------|
| Fragaria vesca g12690          | G I P D R V T T E V F I A M S K A L N F I N P D E L S M Q C I L I A L N R F L Q |
| Arabidopsis thaliana At4g14210 | G V P E R V T D E V F I A M S K A L N F I N P D E L S M Q C I L I A L N R F L Q |
| Capsicum annuum                | G V P D R V T D E V F I A M S K A L N F I N P D E L S M Q C I L I A L N R F L Q |
| Solanum lycopersicum           | G V P D R V T D E V F I A M S K A L N F I N P D E L S M Q C I L I A L N R F L Q |
| Glycine max PDS1               | G V P E R V T D E V F I A M S K A L N F I N P D E L S M Q C I L I A L N R F L Q |
| Zea mays                       | G V P D R V N D E V F I A M S K A L N F I N P D E L S M Q C I L I A L N R F L Q |
| Oryza sativa Osl_010044        | G V P D R V N D E V F I A M S K A L N F I N P D E L S M Q C I L I A L N R F L Q |

**Fig. S7.** Amino acid sequences for published plant *PDS* genes aligned against *Fragaria vesca*.

The extraction shown is the alignment for exon 7 of *F. vesca* g12690 (Fv assembly v4). The solid line above the alignment indicates the position of the CRISPR/Cas9 edited nucleotide target sequence.
