# Supplementary material for: CRISPR/Cas9-mediated mutagenesis of phytoene desaturase in diploid and octoploid strawberry
Source: PubMed Central journal article supplement (PMC6495592; doi:10.1186/s13007-019-0428-6), 2019-05-02
Supplement: 13007_2019_428_MOESM12_ESM.pdf [file 13007_2019_428_MOESM12_ESM.pdf]

| Name      | Sequence                                                                 |
|-----------|--------------------------------------------------------------------------|
| P5-300 F  | <i>TCGTCGGCAGCGTCAGATGTGTATAAGAGACAGTGAAGGGCTATTA</i><br>GAAAATGAACAGT   |
| P7-700 R  | <i>GTCTCGTGGGCTCGGAGATGTGTATAAGAGACAGTTTAACCATTCC</i><br>AAAACCTCCTTCTGG |
| TAIL R1   | CATGCTCCTGTCAGAAATTCGGTGATCTTA                                           |
| TAIL R2   | CGGCCAATATCCTAAATGTGCG                                                   |
| TAIL SEQ  | ATCCTAAATGTGCGTGGCTTTATCTGTCTT                                           |
| AD3       | AGWGNAGWANCAWAGG                                                         |
| mcs_F     | AAGTCGTTAATGGCTGCGGA                                                     |
| mcs_R     | GCCATCGCTACCTTAGGACC                                                     |
| Nos-Kan F | GATATCGATACATGAGAATTAAGGGAG                                              |
| Nos-Kan R | GATATCAGCTTGCATGCCGG                                                     |

**Table S5.** Primer sequences

5' extensions are shown in italic font. Degenerate primers: W=A/T; S=G/C; N=A/T/G/C
