# Supplementary material for: CRISPR/Cas9-mediated mutagenesis of phytoene desaturase in diploid and octoploid strawberry
Source: PubMed Central journal article supplement (PMC6495592; doi:10.1186/s13007-019-0428-6), 2019-05-02
Supplement: 13007_2019_428_MOESM13_ESM.pdf [file 13007_2019_428_MOESM13_ESM.pdf]

## 1. TAIL PCR

### *TAIL PCR first round*

|                      |                                                                                                                               |
|----------------------|-------------------------------------------------------------------------------------------------------------------------------|
| Stage 1 (x1 cycle)   | 95 °C 3 min                                                                                                                   |
| Stage 2 ( x5 cycles) | 95 °C 30 sec, 62 °C 1 min, 72 °C 30 sec                                                                                       |
| Stage 3 (x1 cycle)   | 95 °C 3 sec, 25 °C 3 min, * 72 °C 30 sec                                                                                      |
| Stage 4 (x15 cycles) | 95 °C 10 sec, 68 °C 1 min, 72 °C 30 sec<br>95 °C 10 sec, 68 °C 1 min, 72 °C 30 sec<br>95 °C 10 sec, 44 °C 1 min, 72 °C 30 sec |
| Stage 5 (x1 cycle)   | 72 °C 5 min                                                                                                                   |

\*10% ramp (~0.34 °C per second)

### *TAIL PCR second round*

|                      |                                                                                                                                           |
|----------------------|-------------------------------------------------------------------------------------------------------------------------------------------|
| Stage 1 (x1 cycle)   | 95 °C 3 min x1 cycle                                                                                                                      |
| Stage 2 ( x5 cycles) | 95 °C 10 sec, 64 °C 1 min, 72 °C 30 sec                                                                                                   |
| Stage 3 (x15 cycles) | 95 °C 10 sec, * 64 °C 1 min, * 72 °C 30 sec<br>95 °C 10 sec, * 64 °C 1 min, * 72 °C 30 sec<br>95 °C 10 sec, * 44 °C 1 min, * 72 °C 30 sec |
| Stage 4 ( x5 cycles) | 95 °C 10 sec, 44 °C 1 min, 72 °C 2 min, 72 °C 30 sec                                                                                      |
| Stage 5 (x1 cycle)   | 72 °C 5 min                                                                                                                               |

\*30% ramp (~1 °C per second),

Adapted from Liu et al (1995)

## 2. Amplification of sgRNA insert in T-DNA

|                       |                                          |
|-----------------------|------------------------------------------|
| Stage 1 (x1 cycle)    | 95 °C 5 min                              |
| Stage 2 ( x35 cycles) | 95 °C 30 sec, 52 °C 15 sec, 72 °C 10 sec |
| Stage 3 (x1 cycle)    | 72 °C 5 min                              |

## 3. Amplification of Nos-Kan insert in T-DNA

|                       |                                          |
|-----------------------|------------------------------------------|
| Stage 1 (x1 cycle)    | 95 °C 5 min                              |
| Stage 2 ( x35 cycles) | 95 °C 30 sec, 46 °C 15 sec, 72 °C 30 sec |
| Stage 3 (x1 cycle)    | 72 °C 5 min                              |

## 4. Amplification of amplicons for NGS sequencing

|                       |                                          |
|-----------------------|------------------------------------------|
| Stage 1 (x1 cycle)    | 98 °C 30 sec                             |
| Stage 2 ( x35 cycles) | 98 °C 10 sec, 65 °C 30 sec, 72 °C 12 sec |
| Stage 3 (x1 cycle)    | 72 °C 2 min                              |

**Table S6.** PCR cycles used for analysis of plant samples. Reaction volumes: 1=20 µl; 2,3 = 25 µl; 4 = 50 µl.
