# Supplementary material for: CRISPR/Cas9-mediated mutagenesis of phytoene desaturase in diploid and octoploid strawberry
Source: Plant Methods. 2019 May 2;15:45. doi: 10.1186/s13007-019-0428-6 (PMC6495592; doi:10.1186/s13007-019-0428-6)
Supplement: Supplementary file 2 — Additional file 2: Fig. S1. Sequence mutations and corresponding phenotypes of CRISPR/Cas9 transgenic lines of ‘Hawaii 4’. [file 13007_2019_428_MOESM2_ESM.pdf]

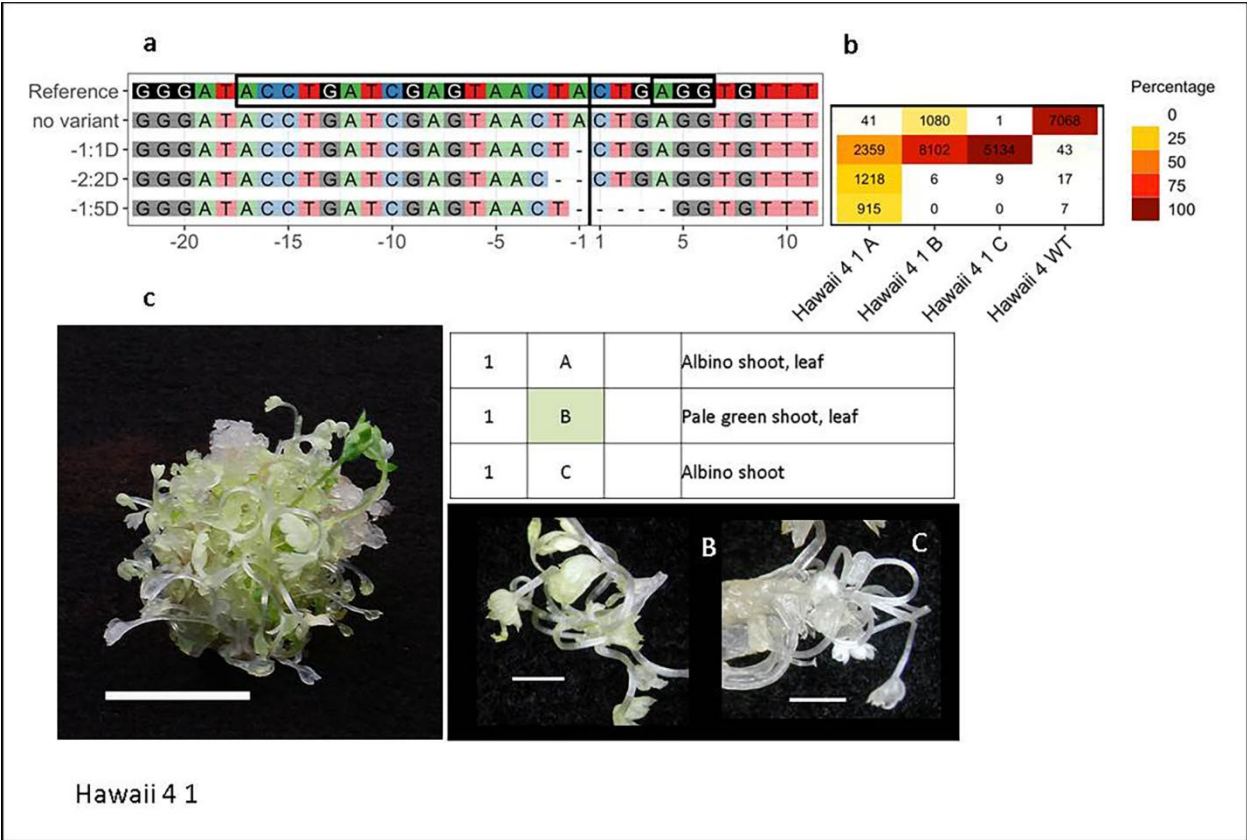

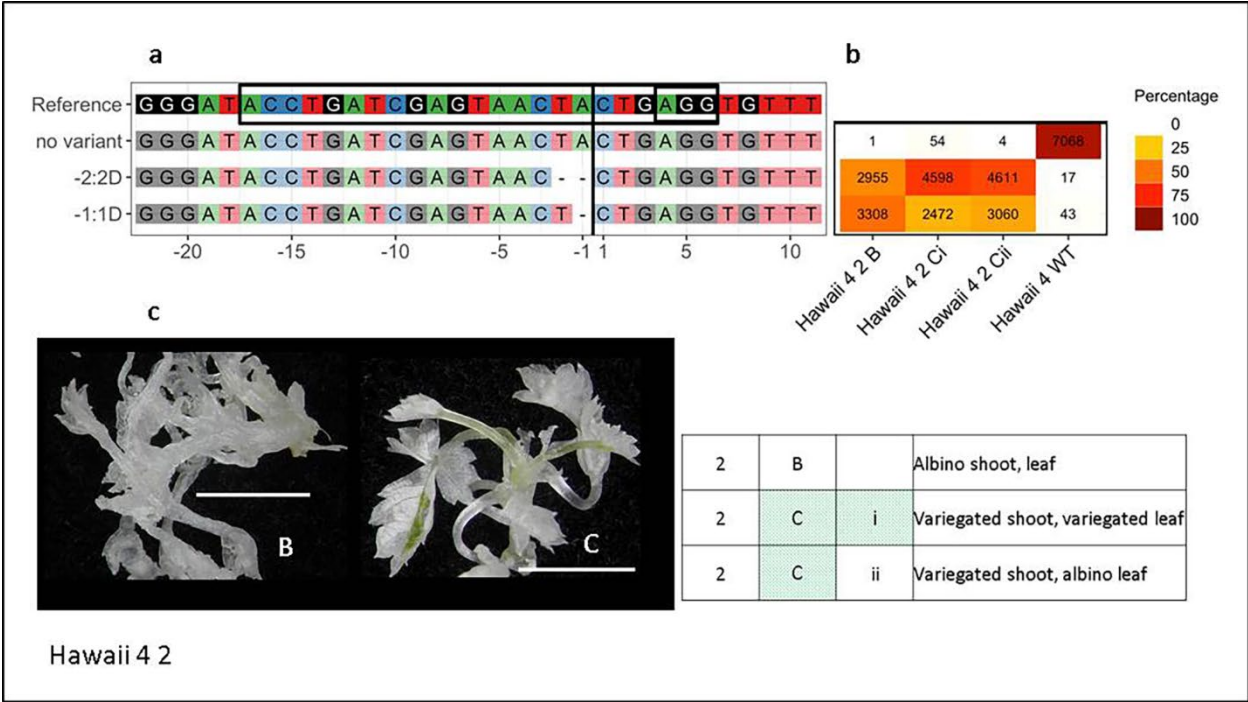

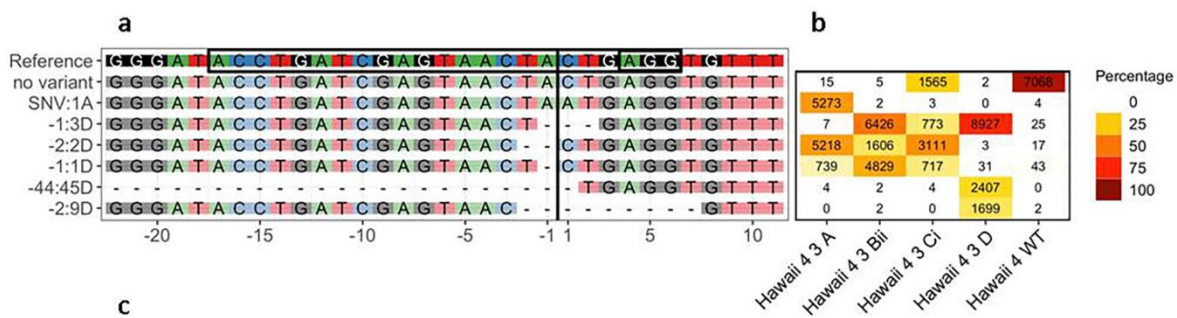

**c**

|   |   |    |                                 |   |   |   |                                   |
|---|---|----|---------------------------------|---|---|---|-----------------------------------|
| 3 | A |    | Green shoot rooted on kanamycin | 3 | C | i | Variegated shoot, variegated leaf |
| 3 | B | ii | Albino axillary, leaf           | 3 | D |   | Albino shoot                      |

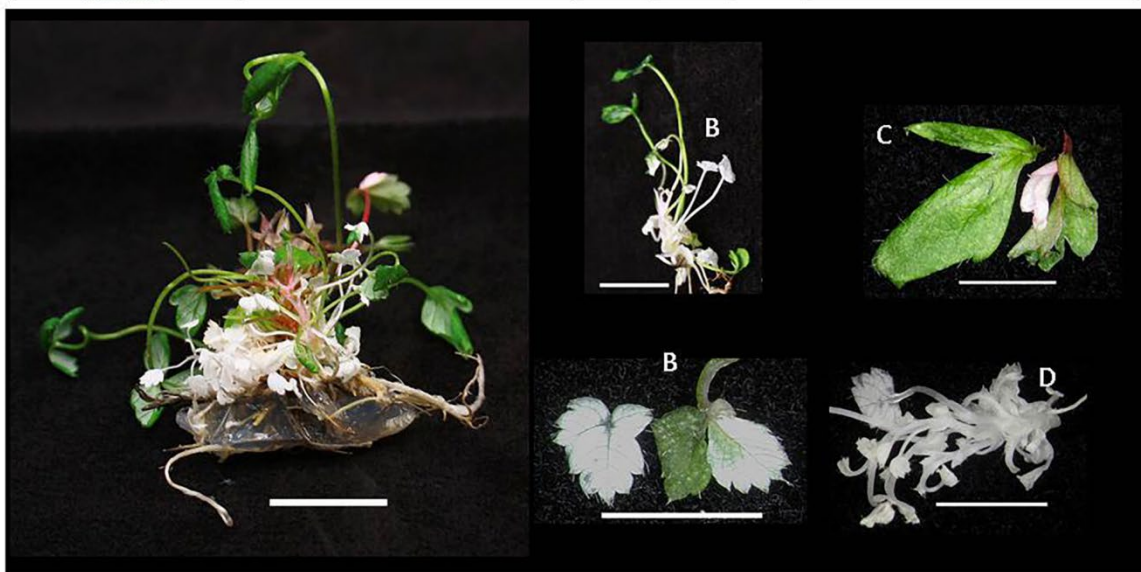

Hawaii 4 3

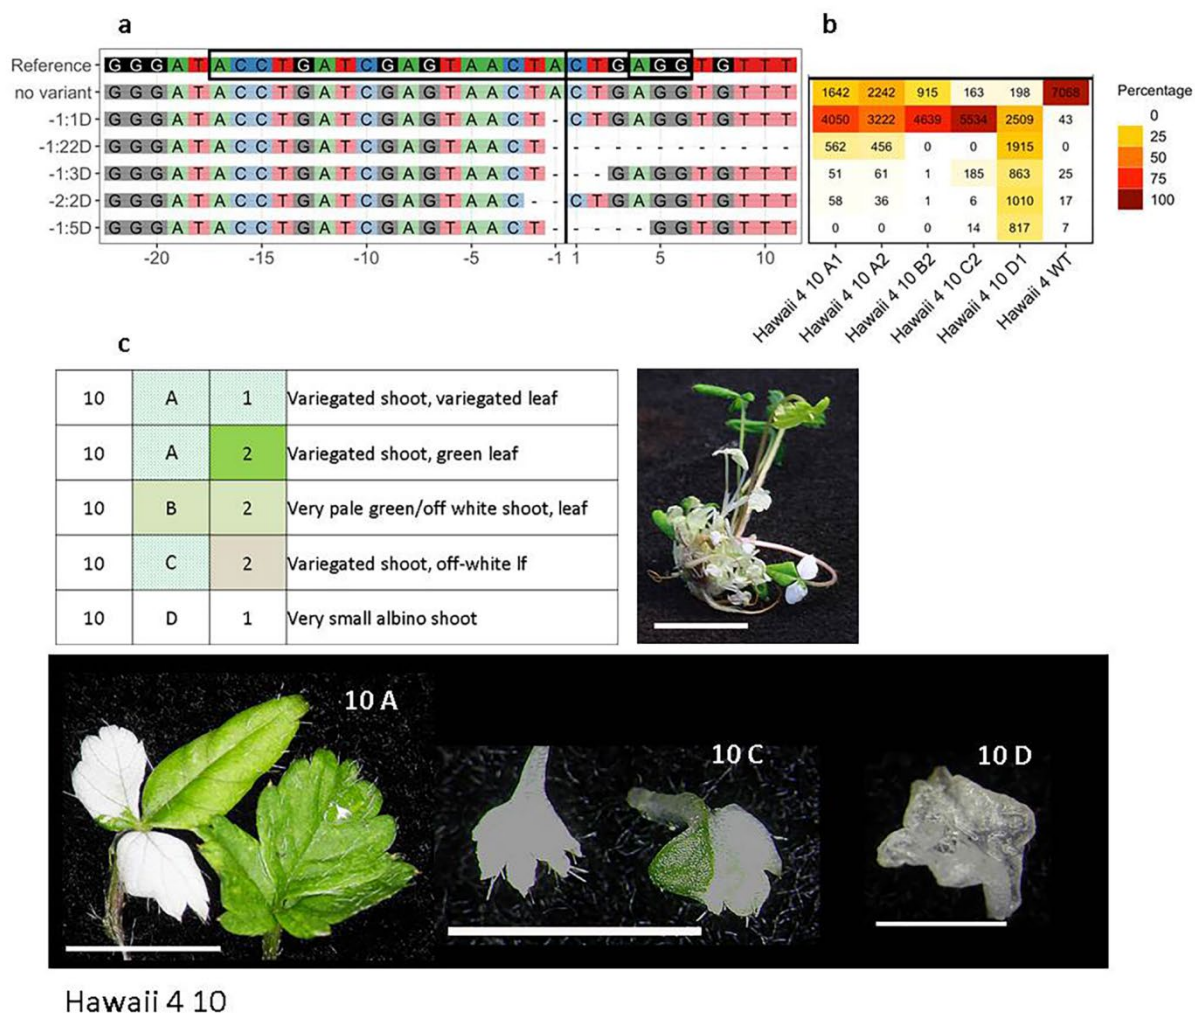



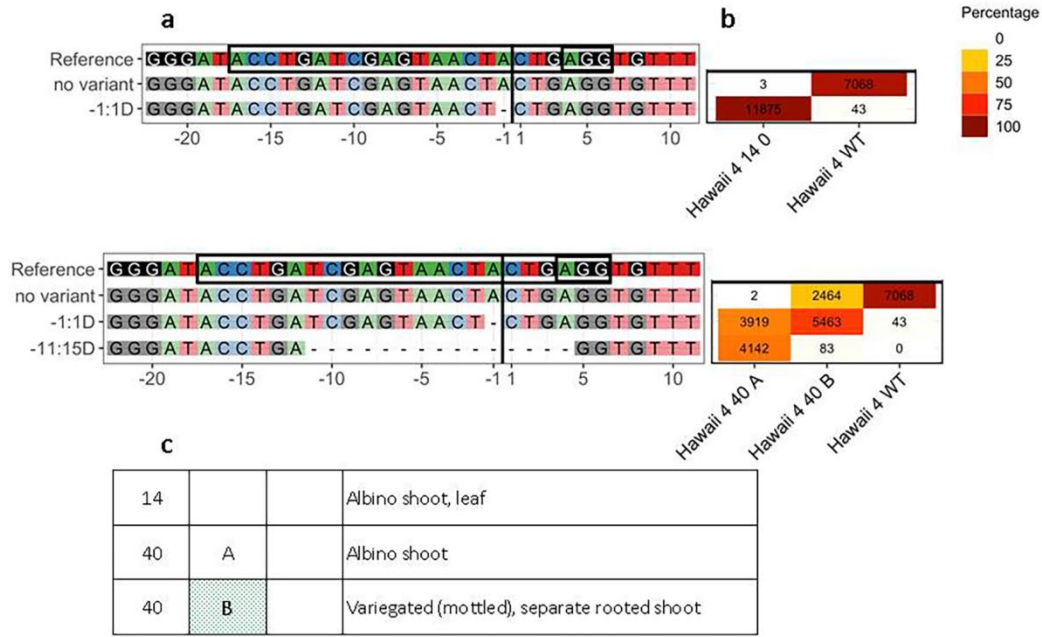

Hawaii 4 14, 40

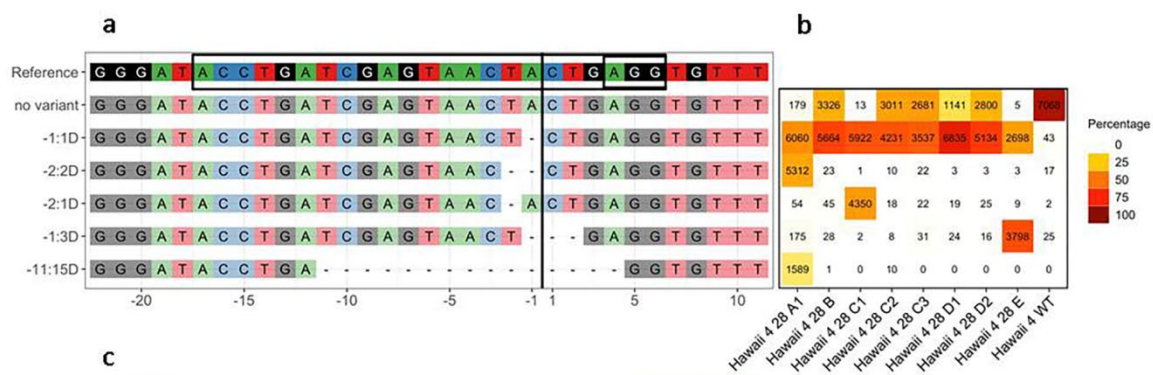

**c**

|    |   |   |                                                             |    |   |   |                                                                           |
|----|---|---|-------------------------------------------------------------|----|---|---|---------------------------------------------------------------------------|
| 28 | A | 1 | White axillary, variegated shoot                            | 28 | C | 3 | Green axillary shoot, green leaf                                          |
| 28 | B |   | Variegated leaf, very small white sector                    | 28 | D | 1 | Variegated shoot, variegated leaf (very small green sector leaf edge tip) |
| 28 | C | 1 | Shoot axillary which is half green, half white, albino leaf | 28 | D | 2 | Variegated shoot, variegated leaf ('harlequin')                           |
| 28 | C | 2 | Shoot axillary which is half green, half white, green leaf  | 28 | E |   | All-albino shoot cluster, leaf                                            |

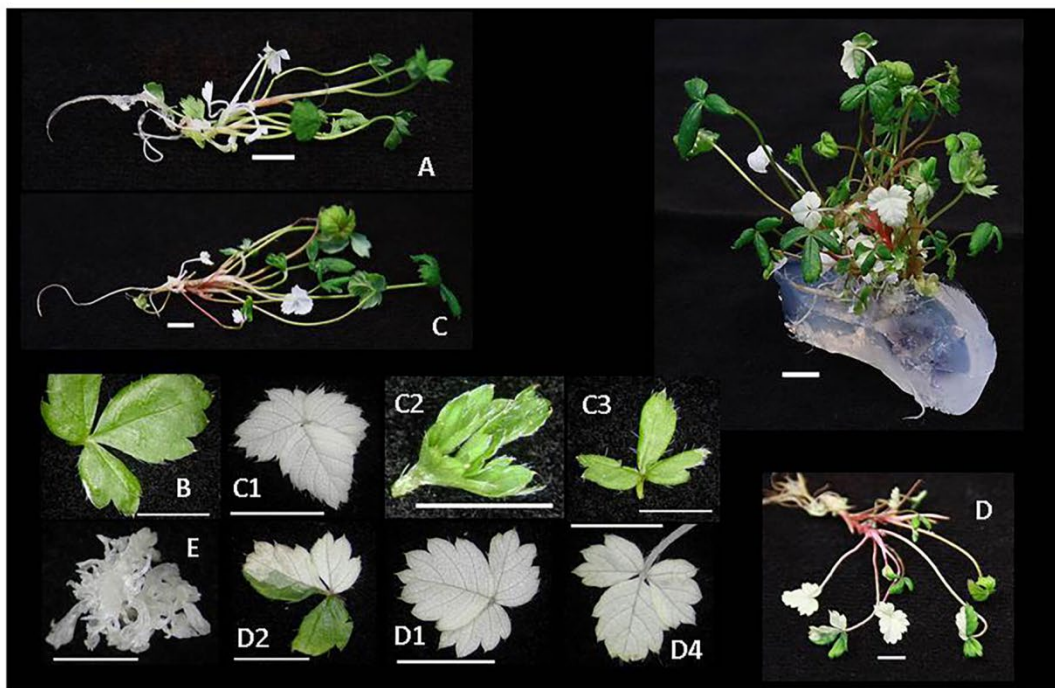

Hawaii 4 28

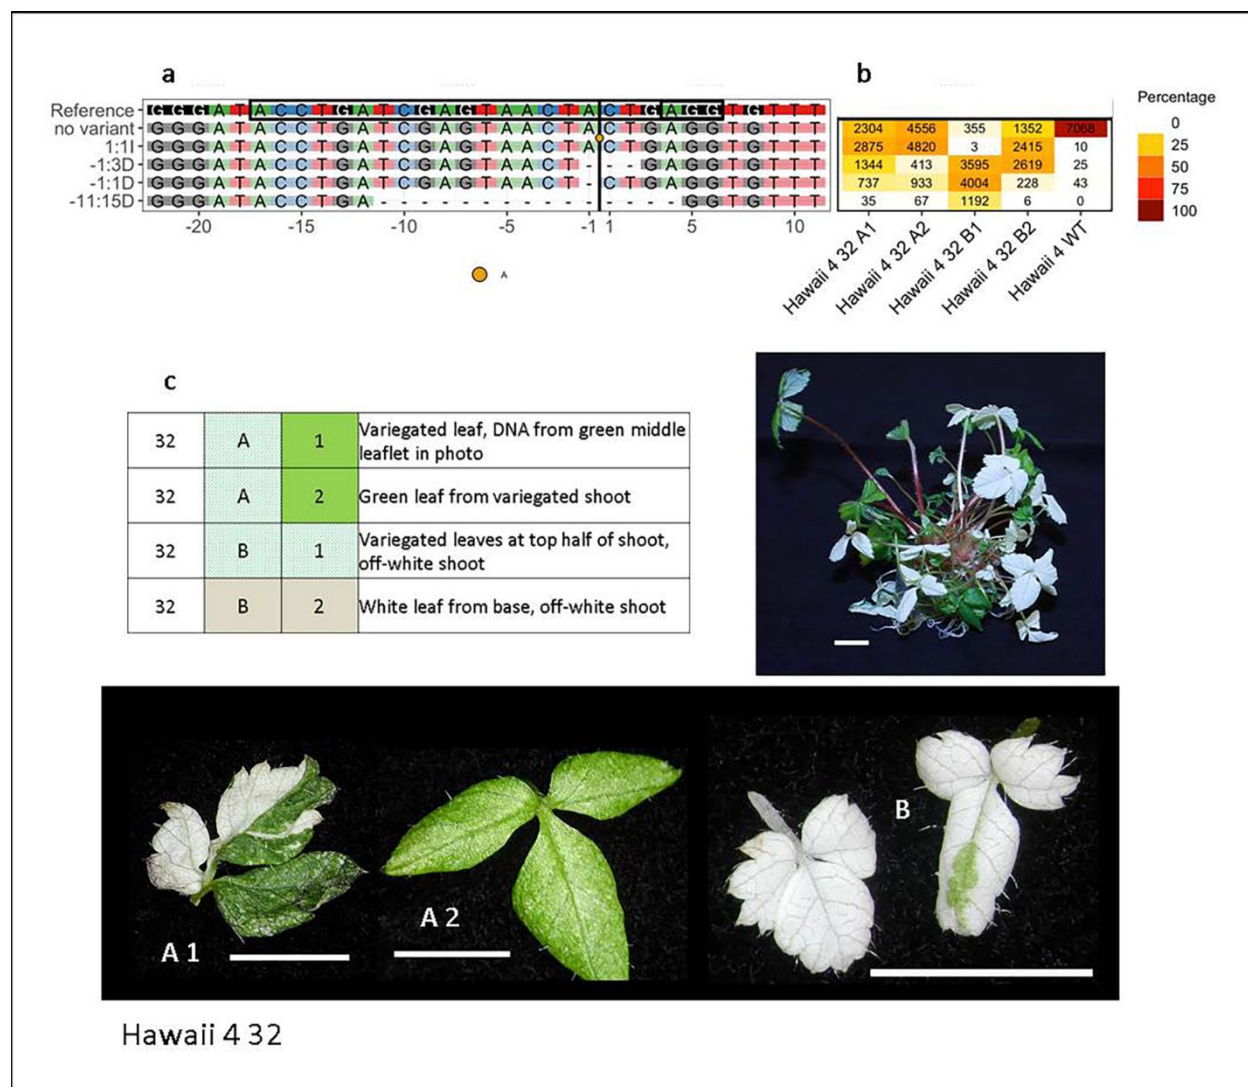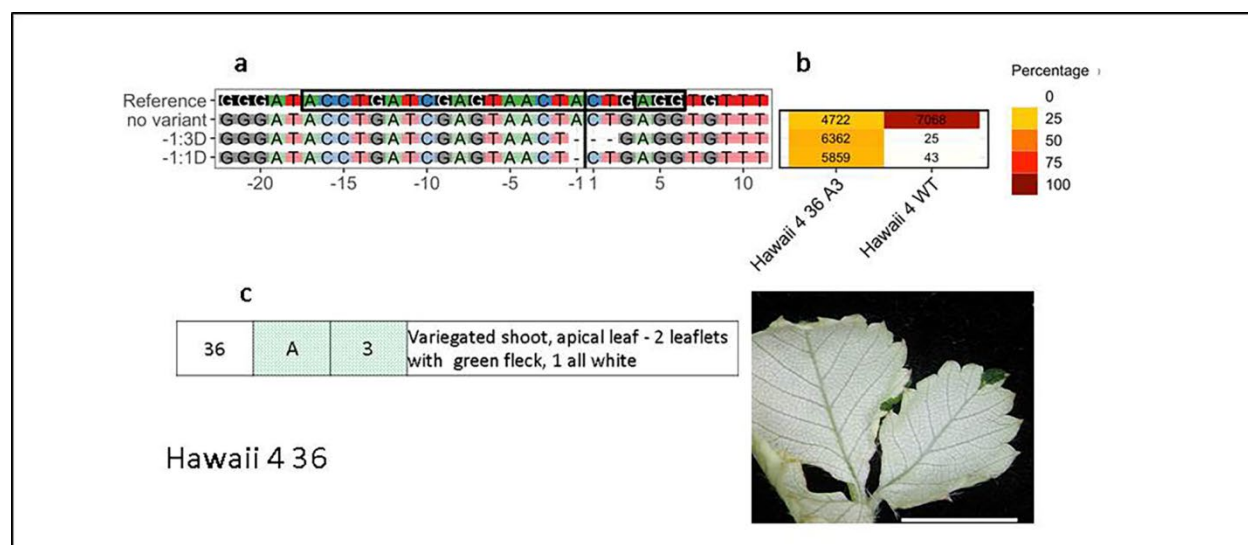

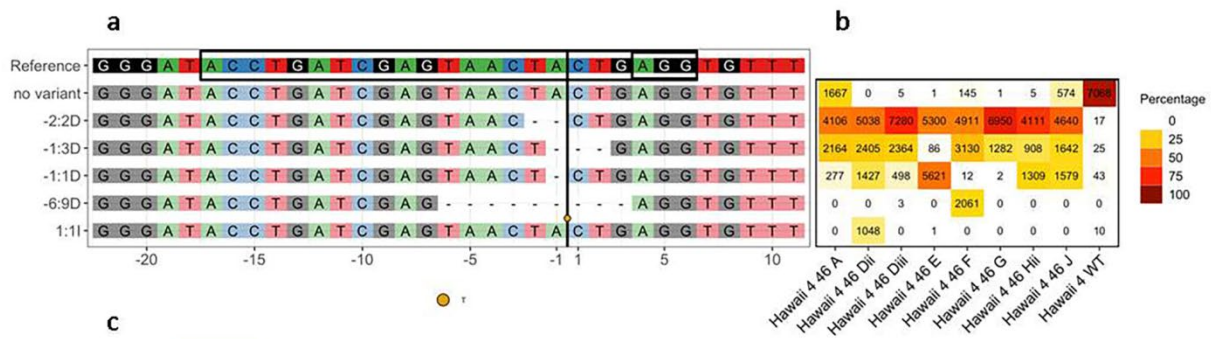

**c**

|    |   |     |                                                                   |
|----|---|-----|-------------------------------------------------------------------|
| 46 | A |     | Green rooted shoot                                                |
| 46 | D | ii  | Albino leaf, from shoot with white and green leaves               |
| 46 | D | iii | Apical albino leaves, green bits at base. Separate shoot from Dii |
| 46 | E |     | Small albino shoot                                                |
| 46 | F |     | Small albino shoot                                                |
| 46 | G |     | Rooted very pale shoot                                            |
| 46 | H | ii  | Variegated shoot, white basal leaf                                |
| 46 | J |     | Pale green shoot, leaf                                            |

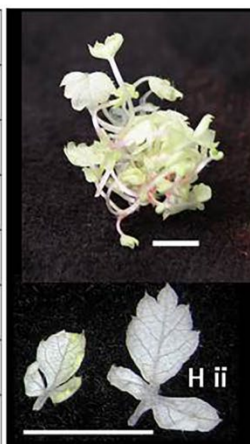

Hawaii 4 46

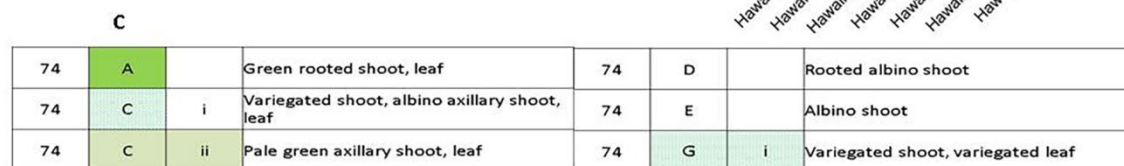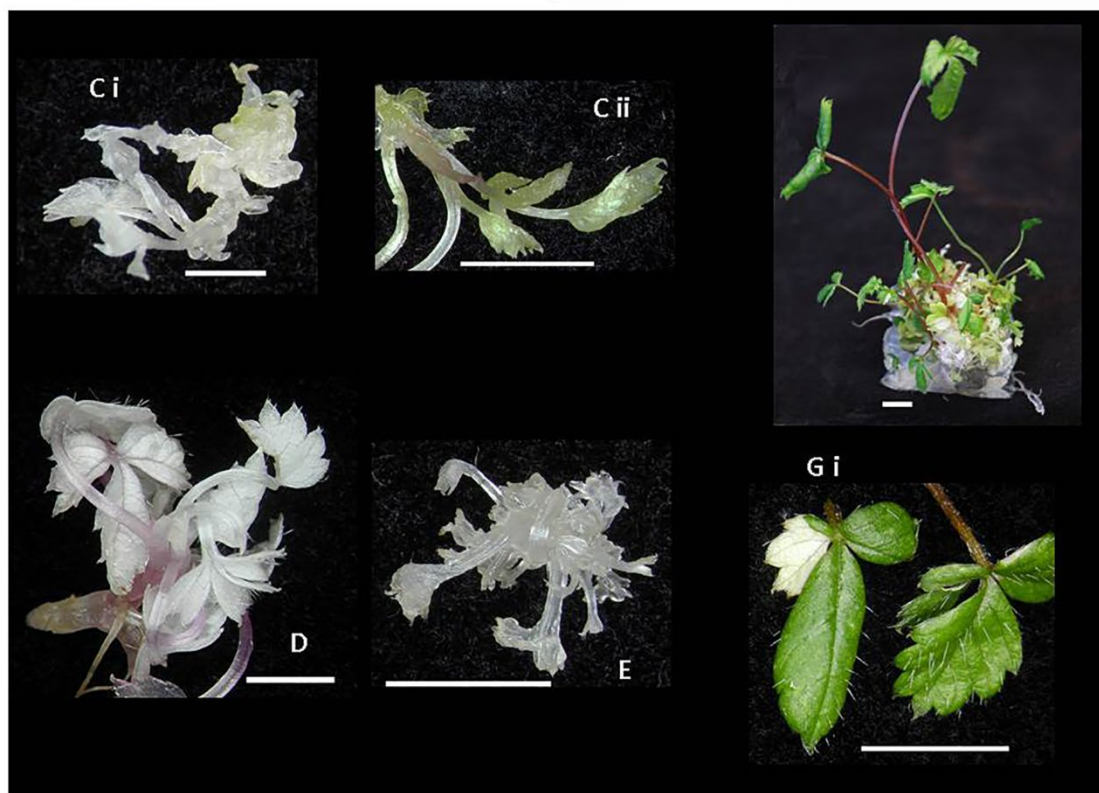

10

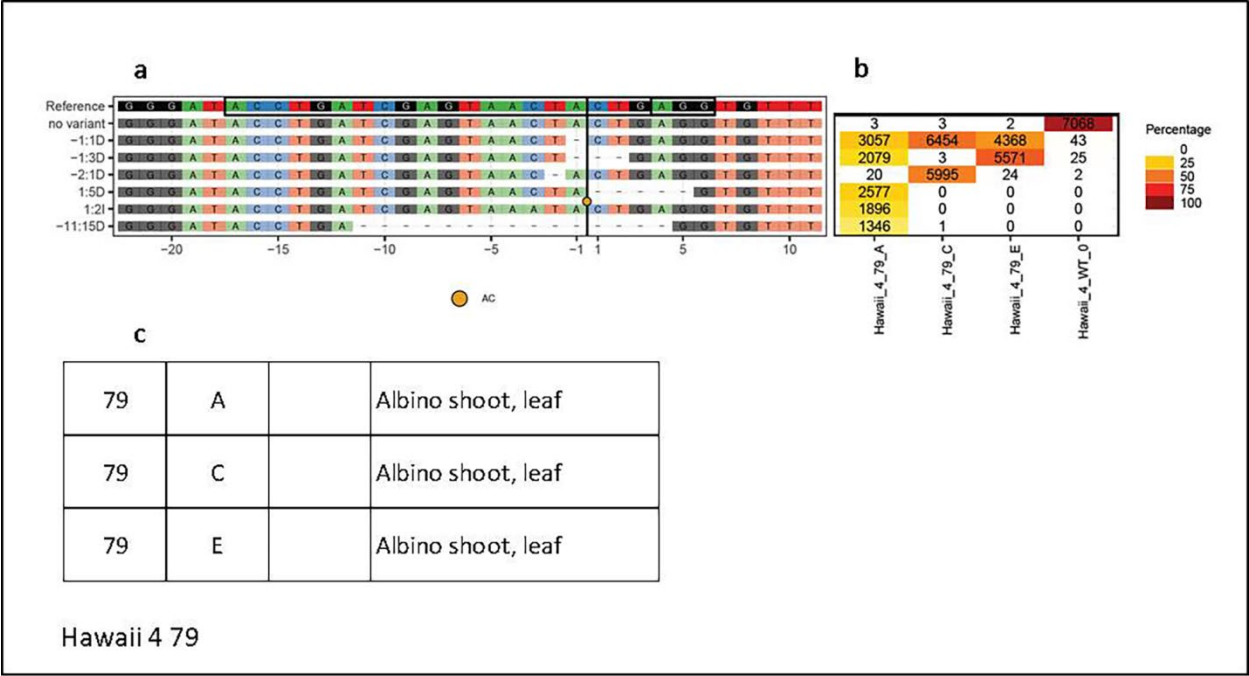

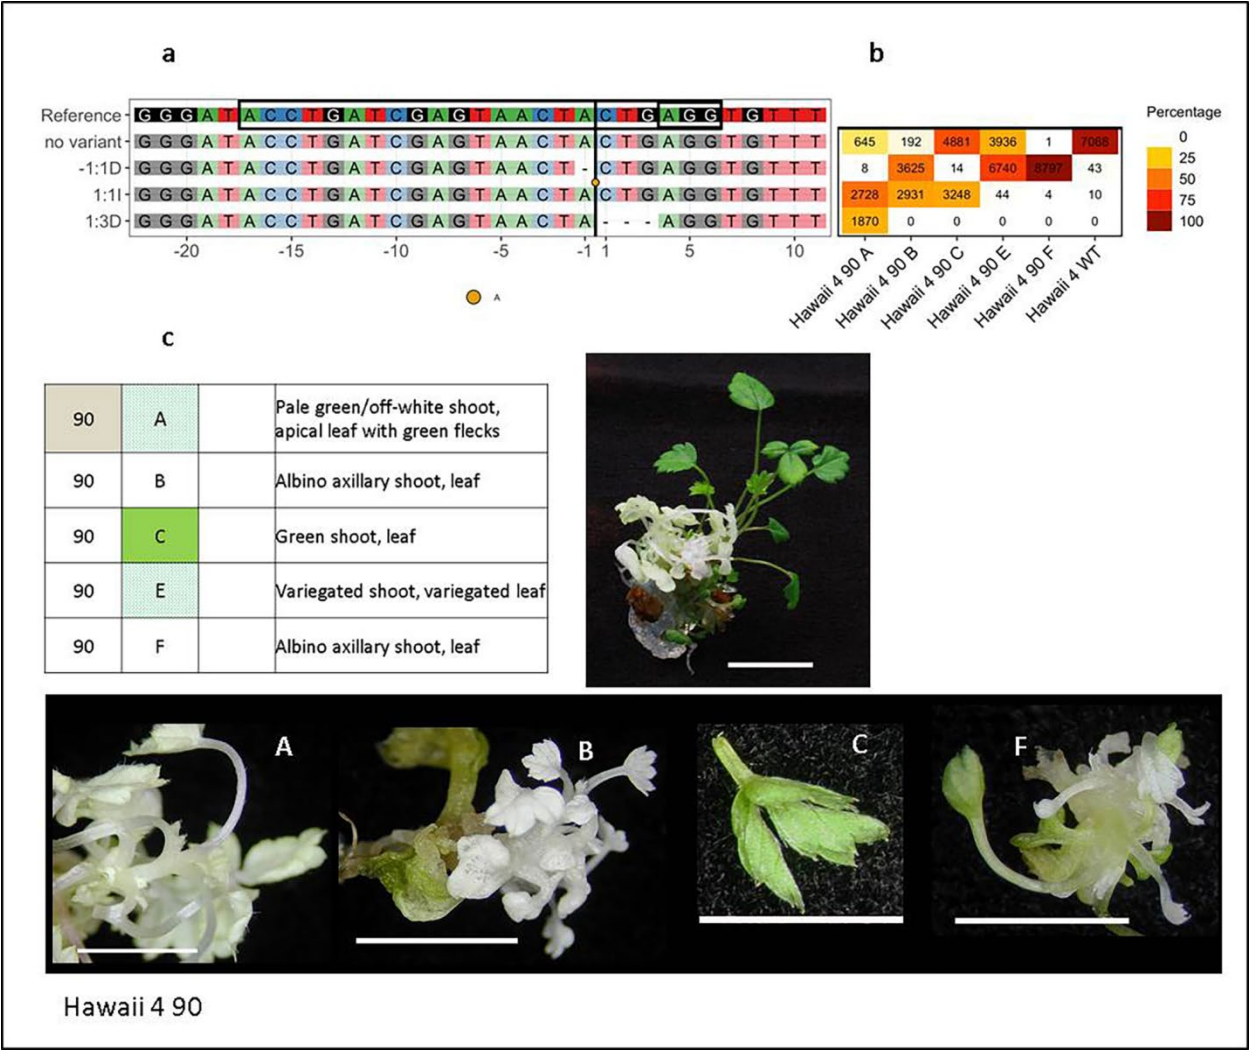

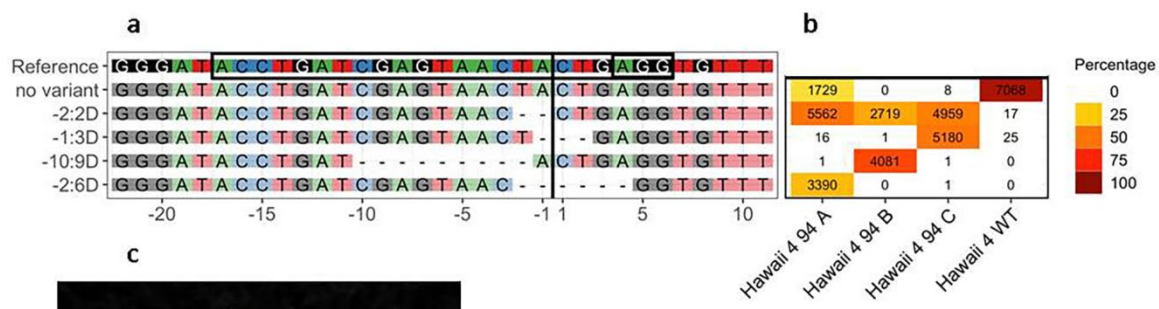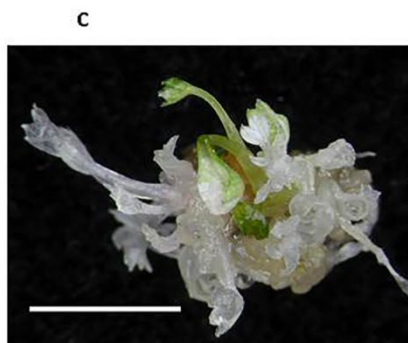

|    |   |                                   |
|----|---|-----------------------------------|
| 94 | A | Variegated shoot, variegated leaf |
| 94 | B | Albino shoot, leaf                |
| 94 | C | Albino shoot, leaf                |

Hawaii 4 94

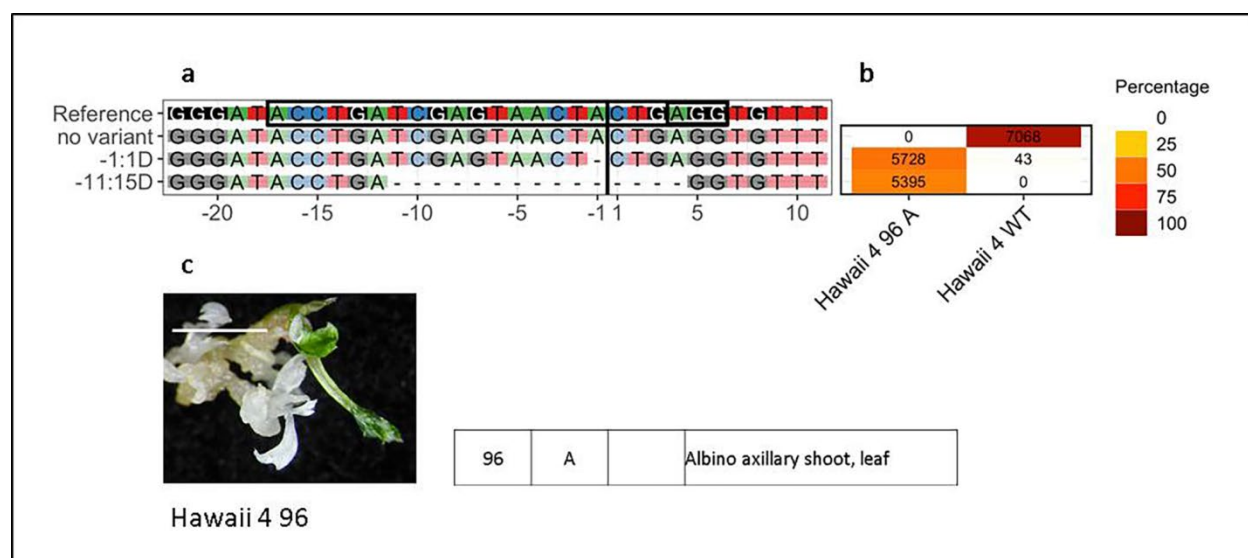

**Fig. S1.** Sequence mutations and corresponding phenotypes of CRISPR/Cas9 transgenic lines of 'Hawaii 4'.

Sequence mutations and allelic variants with corresponding phenotypes in transgenic shoot lines of *Fragaria* 'Hawaii 4'. **a** Alignment of the sequence for each variant to the reference sequence. To the left of the panel, each sequence variant type is identified by the location of the mutation relative to the cut site:number bases deleted (D), inserted (I), or substituted (SNV:location relative to cut site and base substitution). Insertion positions are indicated by an orange circle with the inserted base/s shown. Deletions of 3 bases or multiples of 3 result in amino acid loss. Other deletions and insertions cause frameshift and generate stop codons within exon 7, resulting in truncated PDS protein. Insertions and substitutions result in amino acid substitutions. The cut site is shown by a black vertical line; the target site and PAM site (AGG) are within the box in the reference sequence. **b** Heat map showing the number and percentage of variant reads for each sample. Samples are arranged in columns and identified below the panel. **c** Images of phenotypes and an accompanying table giving descriptions for each sequenced sample. Numbers in the first column refer to the shoot line. In subsequent columns individual shoots from a shoot line are designated using a letter (A, B, etc.) and numbers indicate individual leaves from individual shoots. White, pale green or dark green box shading indicates albino, pale green/variegated or green phenotype respectively, for shoots and leaves. WT=wild type. Scale bars are 5 mm.
